# Supplementary material
Source: publisher figshare collection journal article supplement (https://frontiersin.figshare.com/ndownloader/files/13345331)
Supplement: Supplementary file 1 [file 13345331]

Supplementary Material

Ternary blend solar cells based on a conjugated polymer with diketopyrrolopyrrole and carbazole units

Yanbin Wang1*, Jinxing Chen1, Hyung Do Kim2, Biaobing Wang1*, Ryo Iriguchi2, Hideo Ohkita2*

*** Correspondence:**

Yanbin Wang, wangyanbin@cczu.edu.cn; Biaobing Wang, biaobing@cczu.edu.cn; Hideo Ohkita, ohkita@photo.polym.kyoto-u.ac.jp

# Photoelectron yield spectroscopy (PYS)

The ionization potential of the sample films was measured with a photoelectron yield spectrometer (PYS) (Riken Keiki, AC-3). The sample films were fabricated by spin-coating from a chlorobenzene solution onto a cleaned ITO substrate. The ionization potential energy was estimated from a threshold energy of the cubic root of the photoelectron yield plotted against the incident photon energy.


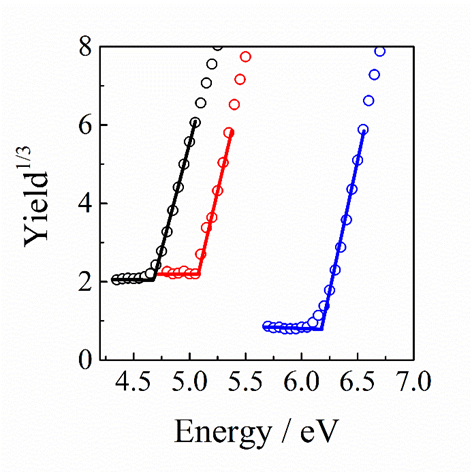


**Fig. S1.**  The photoemission yield spectra of P3HT (black circles), PCDPP4T (red circles), and PCBM (blue circles) neat films.

# Charge mobility

Charge carrier mobilities were evaluated from *J*–*V* characteristics using the space-charge-limited current (SCLC) method with the Mott–Gurney equation for the current density *J*SCLC expressed as , where *ε*r is the dielectric constant of the film (*ε*r = 3 was assumed), and *L* is the thickness of the active layer. The mobilities were evaluated from SCLC currents measured for the hole-only devices with a layered structure of ITO/PEDOT:PSS/active layer/Au.


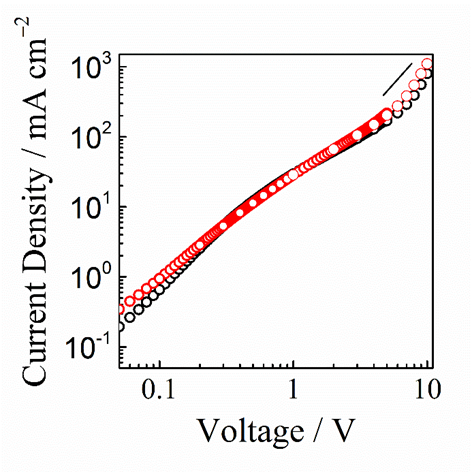


**Fig. S2.** *J*–*V* characteristics of hole-only devices with P3HT/PCBM binary blend (black circles) and P3HT/PCDPP4T/PCBM ternary blend (red circles) films as an active layer. The solid line represents a line with a slope of two.

**Table S1.** Hole mobilities of binary and ternary blend films.

|  | P3HT/PCBM | P3HT/PCDPP4T/PCBM |
| --- | --- | --- |
| *μ*h / 10−4 cm2 V−1 s−1 | 7.9 | 9.9 |

# Morphology

Top surface morphology was measured by atomic force microscopy (Shimadzu, SPM-9600) in tapping mode using a high resolution cantilever (MikroMasch, Hi’Res-C14/Cr-Au) with a force constant of ≈5 N m−1 and a resonance frequency of 160 kHz.


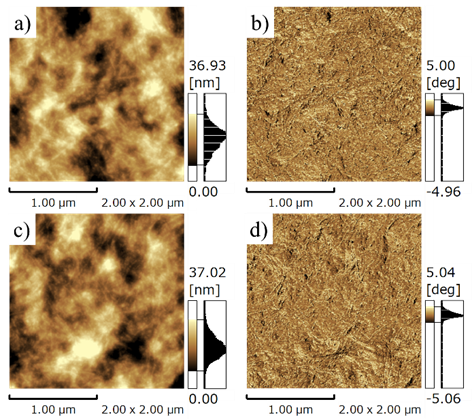


**Fig. S3.** AFM height (a, c) and (b, d) phase images for P3HT/PCBM binary blend (a, b) and P3HT/PCDPP4T/PCBM ternary blend (c, d) films.
